# Supplementary material for: Prognosis stratification and response to treatment in breast cancer based on one-carbon metabolism-related signature
Source: Front Oncol. 2024 Jan 4;13:1288909. doi: 10.3389/fonc.2023.1288909 (PMC10794736; doi:10.3389/fonc.2023.1288909)
Supplement: Supplementary file 2 [file DataSheet_2.xlsx]

## Sheet: GSE20685
---
title: "GSE20685_Data processing"
author: "Tongxin Zhang"
date: "2023-11-25"
output: html_document
---
```{r setup, include=FALSE}
knitr::opts_chunk$set(echo = TRUE)
#Data Download
rm(list = ls())
library(GEOquery)
#Load data; first go to the web page to determine whether it is the expression of the chip data, if not, you can not use this process; can also be directly downloaded from the official website
gse_number = "GSE20685"
eSet <- getGEO(gse_number, destdir = '.', getGPL = F)
class(eSet)
length(eSet)
eSet = eSet[[1]]
#(1)Extract the expression matrix exp
exp <- exprs(eSet)
dim(exp)
exp[1:4,1:4]
#Check if the matrix is normal, if it is empty it will report an error, empty and matrices with negative values and outliers need to process the raw data.
#If the expression matrix is empty, most of it is transcriptome data and cannot be used with this process
#Determine if the following step is necessary
if(F)exp = log2(exp+1)
boxplot(exp)
#(2)Extract clinical information
pd <- pData(eSet)
#(3)Make the exp column names exactly the same order as the pd's row names
p = identical(rownames(pd),colnames(exp));p
if(!p) exp = exp[,match(rownames(pd),colnames(exp))]
#(4)Extract chip platform number
gpl_number <- eSet@annotation;gpl_number
save(gse_number,pd,exp,gpl_number,file = "step1output.Rdata")
#Probe Annotation Acquisition；Only "GPL570" is available, others incomplete
library(tinyarray)
library(stringr)
find_anno(gpl_number)
ids <- AnnoProbe::idmap('GPL570')
#shortcut
library(tinyarray)
find_anno(gpl_number)
library(hgu133plus2.db);ids <- toTable(hgu133plus2SYMBOL)
#Probe Name Conversion
colnames(ids) = c("probe_id","symbol")
exp = trans_array(exp,ids)
#Survival Information Organization; Choose what you need
surv = pd[,c("title","characteristics_ch1.1","characteristics_ch1.2","characteristics_ch1.3","characteristics_ch1.4")]
#Unit of survival time (months);also direct next step with excel
#surv[,(2:5)]<-as.numeric(unlist(surv[,(2:5)]))
#surv$`overall survival time_days:ch1` = surv$`overall survival time_days:ch1`/30
#Save；Survival information exported and organized in excel; column names, survival time units (months)
write.csv(surv,file = "meta.csv")
write.csv(exp,file = "exprSet.csv")
#Can be stored as Rdata
#save(exp,surv,file = "geo_exp_surv.Rdata")
```
## R Markdown
This is an R Markdown document. Markdown is a simple formatting syntax for authoring HTML, PDF, and MS Word documents. For more details on using R Markdown see <http://rmarkdown.rstudio.com>.
When you click the **Knit** button a document will be generated that includes both content as well as the output of any embedded R code chunks within the document. You can embed an R code chunk like this:
```{r cars}
summary(cars)
```
## Including Plots
You can also embed plots, for example:
```{r pressure, echo=FALSE}
plot(pressure)
```
Note that the `echo = FALSE` parameter was added to the code chunk to prevent printing of the R code that generated the plot.

## Sheet: GSE88770
---
title: "GSE88770_Data processing"
author: "Tongxin Zhang"
date: "2023-11-25"
output: html_document
---
```{r setup, include=FALSE}
knitr::opts_chunk$set(echo = TRUE)
#Data Download
rm(list = ls())
library(GEOquery)
#Load data; first go to the web page to determine whether it is the expression of the chip data, if not, you can not use this process
gse_number = "GSE88770"
eSet <- getGEO(gse_number, destdir = '.', getGPL = F)
class(eSet)
length(eSet)
eSet = eSet[[1]]
#(1)Extract the expression matrix exp
exp <- exprs(eSet)
dim(exp)
exp[1:4,1:4]
#Check if the matrix is normal, if it is empty it will report an error, empty and matrices with negative values and outliers need to process the raw data.
#If the expression matrix is empty, most of it is transcriptome data and cannot be used with this process
#Determine if the following step is necessary
if(F)exp = log2(exp+1)
boxplot(exp)
#(2)Extract clinical information
pd <- pData(eSet)
#(3)Make the exp column names exactly the same order as the pd's row names
p = identical(rownames(pd),colnames(exp));p
if(!p) exp = exp[,match(rownames(pd),colnames(exp))]
#(4)Extract chip platform number
gpl_number <- eSet@annotation;gpl_number
save(gse_number,pd,exp,gpl_number,file = "step1output.Rdata")
```
## R Markdown
This is an R Markdown document. Markdown is a simple formatting syntax for authoring HTML, PDF, and MS Word documents. For more details on using R Markdown see <http://rmarkdown.rstudio.com>.
When you click the **Knit** button a document will be generated that includes both content as well as the output of any embedded R code chunks within the document. You can embed an R code chunk like this:
```{r cars}
summary(cars)
```
## Including Plots
You can also embed plots, for example:
```{r pressure, echo=FALSE}
plot(pressure)
```
Note that the `echo = FALSE` parameter was added to the code chunk to prevent printing of the R code that generated the plot.

## Sheet: GSE58812
---
title: "GSE58812_Data processing"
author: "Tongxin Zhang"
date: "2023-11-25"
output: html_document
---
```{r setup, include=FALSE}
knitr::opts_chunk$set(echo = TRUE)
#Data Download
rm(list = ls())
library(GEOquery)
#Load data; first go to the web page to determine whether it is the expression of the chip data, if not, you can not use this process
gse_number = "GSE58812"
eSet <- getGEO(gse_number, destdir = '.', getGPL = F)
class(eSet)
length(eSet)
eSet = eSet[[1]]
#(1)Extract the expression matrix exp
exp <- exprs(eSet)
dim(exp)
exp[1:4,1:4]
#Check if the matrix is normal, if it is empty it will report an error, empty and matrices with negative values and outliers need to process the raw data.
#If the expression matrix is empty, most of it is transcriptome data and cannot be used with this process
#Determine if the following step is necessary
if(F)exp = log2(exp+1)
boxplot(exp)
#(2)Extract clinical information
pd <- pData(eSet)
#(3)Make the exp column names exactly the same order as the pd's row names
p = identical(rownames(pd),colnames(exp));p
if(!p) exp = exp[,match(rownames(pd),colnames(exp))]
#(4)Extract chip platform number
gpl_number <- eSet@annotation;gpl_number
save(gse_number,pd,exp,gpl_number,file = "step1output.Rdata")
```
## R Markdown
This is an R Markdown document. Markdown is a simple formatting syntax for authoring HTML, PDF, and MS Word documents. For more details on using R Markdown see <http://rmarkdown.rstudio.com>.
When you click the **Knit** button a document will be generated that includes both content as well as the output of any embedded R code chunks within the document. You can embed an R code chunk like this:
```{r cars}
summary(cars)
```
## Including Plots
You can also embed plots, for example:
```{r pressure, echo=FALSE}
plot(pressure)
```
Note that the `echo = FALSE` parameter was added to the code chunk to prevent printing of the R code that generated the plot.

## Sheet: GSE61304
---
title: "GSE61304_Data processing"
author: "Tongxin Zhang"
date: "2023-11-25"
output: html_document
---
```{r setup, include=FALSE}
knitr::opts_chunk$set(echo = TRUE)
#Data Download
rm(list = ls())
library(GEOquery)
#Load data; first go to the web page to determine whether it is the expression of the chip data, if not, you can not use this process
gse_number = "GSE61304"
eSet <- getGEO(gse_number, destdir = '.', getGPL = F)
class(eSet)
length(eSet)
eSet = eSet[[1]]
#(1)Extract the expression matrix exp
exp <- exprs(eSet)
dim(exp)
exp[1:4,1:4]
#Check if the matrix is normal, if it is empty it will report an error, empty and matrices with negative values and outliers need to process the raw data.
#If the expression matrix is empty, most of it is transcriptome data and cannot be used with this process
#Determine if the following step is necessary
if(F)exp = log2(exp+1)
boxplot(exp)
#(2)Extract clinical information
pd <- pData(eSet)
#(3)Make the exp column names exactly the same order as the pd's row names
p = identical(rownames(pd),colnames(exp));p
if(!p) exp = exp[,match(rownames(pd),colnames(exp))]
#(4)Extract chip platform number
gpl_number <- eSet@annotation;gpl_number
save(gse_number,pd,exp,gpl_number,file = "step1output.Rdata")
```
## R Markdown
This is an R Markdown document. Markdown is a simple formatting syntax for authoring HTML, PDF, and MS Word documents. For more details on using R Markdown see <http://rmarkdown.rstudio.com>.
When you click the **Knit** button a document will be generated that includes both content as well as the output of any embedded R code chunks within the document. You can embed an R code chunk like this:
```{r cars}
summary(cars)
```
## Including Plots
You can also embed plots, for example:
```{r pressure, echo=FALSE}
plot(pressure)
```
Note that the `echo = FALSE` parameter was added to the code chunk to prevent printing of the R code that generated the plot.

## Sheet: Prognostic model
#survival analysis
rm(list = ls())
proj = "GSE20685"
load(paste0(proj,"_sur_model.Rdata"))
ls()
library(survival)
library(survminer)
exprSet[1:4,1:4]
meta[1:4,1:4]
#univariate Cox analysis
coxfile = paste0(proj,"_cox.Rdata")
if(!file.exists(coxfile)){
cox_results <-apply(exprSet , 1 , function(gene){
meta$gene = gene
#continuous variables can be used directly
m = coxph(Surv(time, event) ~ gene, data = meta)
beta <- coef(m)
se <- sqrt(diag(vcov(m)))
HR <- exp(beta)
HRse <- HR * se
#summary(m)
tmp <- round(cbind(coef = beta,
se = se, z = beta/se,
p = 1 - pchisq((beta/se)^2, 1),
HR = HR, HRse = HRse,
HRz = (HR - 1) / HRse,
HRp = 1 - pchisq(((HR - 1)/HRse)^2, 1),
HRCILL = exp(beta - qnorm(.975, 0, 1) * se),
HRCIUL = exp(beta + qnorm(.975, 0, 1) * se)), 3)
return(tmp['gene',])
#return(tmp['grouphigh',])#categorical variable
})
cox_results=as.data.frame(t(cox_results))
save(cox_results,file = coxfile)
}
load(coxfile)
table(cox_results$p<0.05)
cox = rownames(cox_results)[cox_results$p<0.05];length(cox)
a=cox
exprSet = exprSet[a,]
library(readr)
onecarbon <- read_csv("onecarbon.csv")
exprSet = exprSet[rownames (exprSet) %in% onecarbon$'name',]
#log-rank test
logrankfile = paste0(proj,"_log_rank_p.Rdata")
if(!file.exists(logrankfile)){
log_rank_p <- apply(exprSet , 1 , function(gene){
meta$group=ifelse(gene>median(gene),'high','low')
data.survdiff=survdiff(Surv(time, event)~group,data=meta)
p.val = 1 - pchisq(data.survdiff$chisq, length(data.survdiff$n) - 1)
return(p.val)
})
log_rank_p=sort(log_rank_p)
save(log_rank_p,file = logrankfile)
}
load(logrankfile)
table(log_rank_p<0.05)
lr = names(log_rank_p)[log_rank_p<0.05];length(lr)
exprSet = exprSet[lr,]
#lasso
#Constructing a Model
x=t(exprSet)
y=meta$event
library(glmnet)
#tuning parameter
set.seed(7000)
cv_fit <- cv.glmnet(x=x, y=y)
plot(cv_fit)
#figure
fit <- glmnet(x=x, y=y)
plot(fit,xvar = "lambda")
#Re-modeling with min λ values
model_lasso_min <- glmnet(x=x, y=y,lambda=cv_fit$lambda.min)
model_lasso_a <- glmnet(x=x, y=y,lambda=cv_fit$lambda.1se)
head(model_lasso_min$beta,20)
choose_gene_min=rownames(model_lasso_min$beta)[as.numeric(model_lasso_min$beta)!=0]
choose_gene_1se=rownames(model_lasso_a$beta)[as.numeric(model_lasso_a$beta)!=0]
length(choose_gene_min)
length(choose_gene_1se)
save(choose_gene_min,file = paste0(proj,"_lasso_choose_gene_min.Rdata"))
save(choose_gene_1se,file = paste0(proj,"_lasso_choose_gene_1se.Rdata"))
#Model prediction and evaluation
lasso.prob <- predict(cv_fit, newx=x , s=c(cv_fit$lambda.min,cv_fit$lambda.min) )
re=cbind(y ,lasso.prob)
head(re)
re=as.data.frame(re)
colnames(re)=c('event','prob_min','prob_a')
re$event=as.factor(re$event)
#ROC curve
library(pROC)
library(ggplot2)
m <- roc(meta$event, re$prob_min)
g <- ggroc(m,legacy.axes = T,size = 1,color = "#2fa1dd")
auc(m)
g + theme_minimal() +
geom_segment(aes(x = 0, xend = 1, y = 0, yend = 1),
colour = "grey", linetype = "dashed")+
annotate("text",x = .75, y = .25,
label = paste("AUC of min = ",format(round(as.numeric(auc(m)),2),nsmall = 2)),color = "#2fa1dd")
#Construct cox models and predict
proj = "GSE20685"
load(paste0(proj,"_sur_model.Rdata"))
load(paste0(proj,"_lasso_choose_gene_min.Rdata"))
library(survival)
library(survminer)
library(ggplotify)
library(cowplot)
library(Hmisc)
options(scipen=200)
library(pheatmap)
library(stringr)
e=t(exprSet[choose_gene_min,])
colnames(e)= str_replace_all(colnames(e),"-","_")
dat=cbind(meta,e)
colnames(dat)
library(survival)
library(survminer)
dat2 = na.omit(dat)
model = coxph(formula = Surv(time, event) ~ MAT2B + DNMT3B + AHCYL1 + CHDH + SHMT2 + CHKB + CHPT1, data = dat2,
method = "efron")
ggforest(model, data =dat2)
fp <- predict(model,dat2)
names(fp) = dat2$ID
ri = ifelse(fp<median(fp),"lowrisk","highrisk")
ri = factor(ri,levels = c("lowrisk","highrisk"))
sfit <- survfit(Surv(time, event)~ri, data=dat2)
ggsurvplot(sfit,palette = c("#369F2D", "#FA8E44"),
risk.table =TRUE,pval =TRUE,
conf.int =TRUE,xlab ="Time in months",
ggtheme =theme_light())
#Risk Factor Triple Chart Linkage
fp_dat=data.frame(patientid=1:length(fp),
fp=as.numeric(sort(fp)),
ri= ri[order(fp)])
sur_dat=data.frame(patientid=1:length(fp),
time=dat2[order(fp),'time'] ,
event=dat2[order(fp),'event'])
sur_dat$event=ifelse(sur_dat$event==0,'alive','death')
sur_dat$event=factor(sur_dat$event,levels = c("death","alive"))
library(stringr)
gs = str_split("MAT2B + DNMT3B + AHCYL1 + CHDH + SHMT2 + CHKB + CHPT1"," \\+ ")[[1]]
gs
exp_dat = t(dat2[order(fp),gs])
colnames(exp_dat) = str_sub(colnames(exp_dat),1,12)
rownames(exp_dat) = str_replace_all(rownames(exp_dat),"_","-")
#The first figure ----
p1=ggplot(fp_dat,aes(x=patientid,y=fp))+
geom_point(aes(color = ri))+
scale_color_manual(values = c("#369F2D", "#FA8E44"))+
geom_vline(xintercept = 0.5*nrow(sur_dat),lty = 2)+
scale_x_continuous(expand=c(0.01,0))+
labs(x = "",y = "risk score")+
theme_bw()
#The second figure ----
p2=ggplot(sur_dat,aes(x=patientid,y=time))+
geom_point(aes(col=event))+
scale_color_manual(values = c("#FA8E44","#369F2D"))+
geom_vline(xintercept = 0.5*nrow(sur_dat),lty = 2)+
scale_x_continuous(expand=c(0.01,0))+
labs(x = "")+
theme_bw()
#The third figure ----
annotation_col = data.frame(group = ri,
row.names = names(ri))
mycolors <- colorRampPalette(c("#369F2D","white", "#FA8E44"), bias = 1.2)(100)
ann_colors = list(
group = c(lowrisk="#369F2D", highrisk="#FA8E44")
)
p3=pheatmap::pheatmap(exp_dat,
col= mycolors,
annotation_col = annotation_col,
annotation_colors =ann_colors,
scale = "row",
breaks = seq(-3,3,length.out = 100),
show_colnames = F,
cluster_cols = F,
annotation_legend = F)
#Put the picture together
library(patchwork)
p1/p2/as.ggplot(p3)
library(tinyarray)
n = scale(t(exp_dat))
n[n > 3] = 3
n[n < -3] = -3
p3 = ggheat(n,fp_dat$ri,
color = c("#369F2D", "white", "#FA8E44"),
legend_color = c("#369F2D", "#FA8E44", "#e6b707", "#868686", "#66C2A5", "#FC8D62",
"#8DA0CB", "#E78AC3", "#A6D854", "#FFD92F", "#E5C494", "#B3B3B3"),
show_rownames = F)+
theme(axis.text = element_text(size = 8))
p3
p1 /p2 /p3 + plot_layout(design = 'A
B
C
C
C
C')
ggsave("risk_plot.png",height = 10,width = 10)
#risk-plot
knitr::opts_chunk$set(
collapse = TRUE,
comment = "#>"
)
knitr::opts_chunk$set(fig.width = 8, collapse = TRUE)
knitr::opts_chunk$set(message = FALSE,fig.height = 10)
#timeROC
#Constructing the model and completing the prediction
rm(list = ls())
proj = "GSE20685"
load(paste0(proj,"_sur_model.Rdata"))
x=t(exprSet)
y=meta$event
e=t(exprSet)
colnames(e)= str_replace_all(colnames(e),"-","_")
dat=cbind(meta,e)
library(survival)
library(survminer)
dat2 = na.omit(dat)
model = coxph(formula = Surv(time, event) ~ MAT2B + DNMT3B + AHCYL1 + CHDH + SHMT2 + CHKB + CHPT1, data = dat2, method = "efron")
fp <- predict(model,dat2)
names(fp) = dat2$ID
write.csv(fp,file = "fp.csv")
library(readr)
fp <- read_csv("fp.csv")
dat = cbind(dat2[,1:8],
fp[,2])
head(dat)
#time-ROC calculation and graphing
library(survminer)
library(survival)
library(timeROC)
result <-with(dat, timeROC(T=time,
delta=event,
marker=x,
cause=1,
times=c(24,36,60),
iid = TRUE))
plot_dat = data.frame(fpr = as.numeric(result$FP),
tpr = as.numeric(result$TP),
time = rep(as.factor(c(24,36,60)),each = nrow(result$TP)))
library(ggplot2)
ggplot() +
geom_line(data = plot_dat,aes(x = fpr, y = tpr,color = time),size = 1) +
scale_color_manual(name = NULL,values = c("#FA8E44", "#B67FB3","#369F2D"),
labels = paste0("AUC of ",c(2,3,5),"-y survival: ",
format(round(result$AUC,2),nsmall = 2)))+
geom_line(aes(x=c(0,1),y=c(0,1)),color = "grey")+
theme_bw()+
theme(panel.grid = element_blank(),
legend.background = element_rect(linetype = 1, size = 0.2, colour = "black"),
legend.position = c(0.765,0.125))+
scale_x_continuous(expand = c(0.005,0.005))+
scale_y_continuous(expand = c(0.005,0.005))+
labs(x = "1 - Specificity",
y = "Sensitivity")+
coord_fixed()

## Sheet: Independent prognostic analysis
#Independent prognostic analysis
library(survival)
risk=read.table("Risk.txt",header=T,sep="\t",check.names=F,row.names=1)
cli=read.table("Clinical.txt",sep="\t",check.names=F,header=T,row.names=1)
sameSample=intersect(row.names(cli),row.names(risk))
risk=risk[sameSample,]
cli=cli[sameSample,]
rt=cbind(futime=risk[,1],fustat=risk[,2],cli,riskScore=risk[,(ncol(risk)-1)])
uniTab=data.frame()
for(i in colnames(rt[,3:ncol(rt)])){
	cox <- coxph(Surv(futime, fustat) ~ rt[,i], data = rt)
	coxSummary = summary(cox)
	uniTab=rbind(uniTab,
	cbind(id=i,
	HR=coxSummary$conf.int[,"exp(coef)"],
	HR.95L=coxSummary$conf.int[,"lower .95"],
	HR.95H=coxSummary$conf.int[,"upper .95"],
	pvalue=coxSummary$coefficients[,"Pr(>|z|)"])
	)
}
write.table(uniTab,file="unCox.txt",sep="\t",row.names=F,quote=F)
multiCox=coxph(Surv(futime, fustat) ~ ., data = rt)
multiCoxSum=summary(multiCox)
multiTab=data.frame()
multiTab=cbind(
HR=multiCoxSum$conf.int[,"exp(coef)"],
HR.95L=multiCoxSum$conf.int[,"lower .95"],
HR.95H=multiCoxSum$conf.int[,"upper .95"],
pvalue=multiCoxSum$coefficients[,"Pr(>|z|)"])
multiTab=cbind(id=row.names(multiTab),multiTab)
write.table(multiTab,file="muCox.txt",sep="\t",row.names=F,quote=F)
bioForest=function(coxFile=null,forestFile=null,forestCol=null){
		rt <- read.table(coxFile,header=T,sep="\t",row.names=1,check.names=F)
		gene <- rownames(rt)
		hr <- sprintf("%.3f",rt$"HR")
		hrLow <- sprintf("%.3f",rt$"HR.95L")
		hrHigh <- sprintf("%.3f",rt$"HR.95H")
		Hazard.ratio <- paste0(hr,"(",hrLow,"-",hrHigh,")")
		pVal <- ifelse(rt$pvalue<0.001, "<0.001", sprintf("%.3f", rt$pvalue))
		pdf(file=forestFile, width = 6.3,height = 4.5)
		n <- nrow(rt)
		nRow <- n+1
		ylim <- c(1,nRow)
		layout(matrix(c(1,2),nc=2),width=c(3,2.5))
		xlim = c(0,3)
		par(mar=c(4,2.5,2,1))
		plot(1,xlim=xlim,ylim=ylim,type="n",axes=F,xlab="",ylab="")
		text.cex=0.8
		text(0,n:1,gene,adj=0,cex=text.cex)
		text(1.5-0.5*0.2,n:1,pVal,adj=1,cex=text.cex);text(1.5-0.5*0.2,n+1,'pvalue',cex=text.cex,font=2,adj=1)
		text(3,n:1,Hazard.ratio,adj=1,cex=text.cex);text(3,n+1,'Hazard ratio',cex=text.cex,font=2,adj=1,)
		par(mar=c(4,1,2,1),mgp=c(2,0.5,0))
		xlim = c(0,max(as.numeric(hrLow),as.numeric(hrHigh)))
		plot(1,xlim=xlim,ylim=ylim,type="n",axes=F,ylab="",xaxs="i",xlab="Hazard ratio")
		arrows(as.numeric(hrLow),n:1,as.numeric(hrHigh),n:1,angle=90,code=3,length=0.05,col="darkblue",lwd=2.5)
		abline(v=1,col="black",lty=2,lwd=2)
		boxcolor = ifelse(as.numeric(hr) > 1, forestCol, forestCol)
		points(as.numeric(hr), n:1, pch = 15, col = boxcolor, cex=1.3)
		axis(1)
		dev.off()
}
bioForest(coxFile="unCox.txt",forestFile="unForest.pdf",forestCol="green")
bioForest(coxFile="muCox.txt",forestFile="muForest.pdf",forestCol="red")
#nomogram construction
rm(list = ls())
ph=read.csv(file="ph2.csv", header = T, sep = ",", row.names = 1)
head(ph)
library(rms)
dd<-datadist(ph)
options(datadist="dd")
#Change the number of columns in [ ]
mod <- cph(formula = as.formula(paste("Surv(time, event) ~ ",paste(colnames(ph)[2:3],collapse = "+"))),
data=ph,x=T,y=T,surv = T)
surv<-Survival(mod)
surv2<-function(x) surv(730,x)
surv3<-function(x) surv(1095,x)
surv5<-function(x) surv(1825,x)
x<-nomogram(mod,
fun = list(surv2,surv3,surv5),
funlabel = c('2-year survival Probability',
'3-year survival Probability',
'5-year survival Probability'))
plot(x)
#2.beautified version
library(regplot)
library(survival)
mod2 <- coxph(formula = as.formula(paste("Surv(time, event) ~ ",paste(colnames(ph)[2:3],collapse = "+"))),data=ph)
regplot(mod2,
failtime = c(730,1095,1825),
plots = c("no plot","no plot"),
points = T,
prfail = T)
#Mark a patient
regplot(mod2,
observation=ph[1,],
obscol = "#326db1",
failtime = c(730,1095,1825),
plots = c("no plot","no plot"),
points = T,
prfail = T)
#Situation of distribution
regplot(mod2,
title = "",
observation=ph[1,],
failtime = c(730,1095,1825),
plots = c("bars","boxes"),
points = T,
prfail = T)
#calibration curve
f2 <- cph(formula = as.formula(paste("Surv(time, event) ~ ",paste(colnames(ph)[2:3],collapse = "+"))),
data=ph,x=T,y=T,surv = T, time.inc=730)
cal2 <- calibrate(f2, cmethod="KM", method="boot", u=730, m=50, B=1000)
f3 <- cph(formula = as.formula(paste("Surv(time, event) ~ ",paste(colnames(ph)[2:3],collapse = "+"))),
data=ph,x=T,y=T,surv = T, time.inc=1095)
cal3 <- calibrate(f3, cmethod="KM", method="boot", u=1095, m=50, B=1000)
f5 <- cph(formula = as.formula(paste("Surv(time, event) ~ ",paste(colnames(ph)[2:3],collapse = "+"))),
data=ph,x=T,y=T,surv = T, time.inc=1825)
cal5 <- calibrate(f5, cmethod="KM", method="boot", u=1825, m=50, B=1000)
plot(cal2,lwd = 2,lty = 0,errbar.col = c("#FA8E44"),
bty = "l",
xlim = c(0,1),ylim= c(0,1),
xlab = "Nomogram-prediced OS (%)",
ylab = "Observed OS (%)",
col = c("#FA8E44"),
cex.lab=1.2,cex.axis=1, cex.main=1.2, cex.sub=0.6)
lines(cal2[,c('mean.predicted',"KM")],
type = 'b', lwd = 1, col = c("#FA8E44"), pch = 16)
mtext("")
plot(cal3,lwd = 2,lty = 0,errbar.col = c("#B67FB3"),
xlim = c(0,1),ylim= c(0,1),col = c("#B67FB3"),add = T)
lines(cal3[,c('mean.predicted',"KM")],
type = 'b', lwd = 1, col = c("#B67FB3"), pch = 16)
plot(cal5,lwd = 2,lty = 0,errbar.col = c("#369F2D"),
xlim = c(0,1),ylim= c(0,1),col = c("#369F2D"),add = T)
lines(cal5[,c('mean.predicted',"KM")],
type = 'b', lwd = 1, col = c("#369F2D"), pch = 16)
abline(0,1, lwd = 2, lty = 3, col = c("#224444"))
legend("topleft",
legend = c("2-year","3-year","5-year"),
col =c("#FA8E44","#B67FB3","#369F2D"),
lwd = 2,
cex = 1.2,
bty = "n")

## Sheet: Functional enrichment analysis
rm(list = ls())
load(file = 'step4output.Rdata')
library(clusterProfiler)
library(ggthemes)
library(org.Hs.eg.db)
library(dplyr)
library(ggplot2)
library(stringr)
library(enrichplot)
# 1.GO
#(1)input data
gene_up = deg$ENTREZID[deg$change == 'up']
gene_down = deg$ENTREZID[deg$change == 'down']
gene_diff = c(gene_up,gene_down)
#(2)enrichment
if(!file.exists(paste0(gse_number,"_GO.Rdata"))){
ego <- enrichGO(gene = gene_diff,
OrgDb= org.Hs.eg.db,
ont = "ALL",
readable = TRUE)
ego_BP <- enrichGO(gene = gene_diff,
OrgDb= org.Hs.eg.db,
ont = "BP",
readable = TRUE)
#ont参数：One of "BP", "MF", and "CC" subontologies, or "ALL" for all three.
save(ego,ego_BP,file = paste0(gse_number,"_GO.Rdata"))
}
load(paste0(gse_number,"_GO.Rdata"))
#(3)visualization
barplot(ego)
dotplot(ego)
dotplot(ego, split = "ONTOLOGY", font.size = 10,
showCategory = 5) +
facet_grid(ONTOLOGY ~ ., space = "free_y",scales = "free_y") +
scale_y_discrete(labels = function(x) str_wrap(x, width = 45))
#geneList
geneList = deg$logFC
names(geneList)=deg$ENTREZID
#Gene-Concept Network
cnetplot(ego,categorySize="pvalue", foldChange=geneList,colorEdge = TRUE)
cnetplot(ego, showCategory = 3,foldChange=geneList, circular = TRUE, colorEdge = TRUE)
Biobase::package.version("enrichplot")
if(T){
emapplot(pairwise_termsim(ego)) #new version
}else{
emapplot(ego)#old version
}
#(4)https://zhuanlan.zhihu.com/p/99789859
#goplot(ego)
goplot(ego_BP)
#(5)Heatmap-like functional classification
heatplot(ego,foldChange = geneList,showCategory = 8)
# 2.KEGG pathway analysis----
#（1）input data
gene_up = deg[deg$change == 'up','ENTREZID']
gene_down = deg[deg$change == 'down','ENTREZID']
gene_diff = c(gene_up,gene_down)
#（2）Enrichment analysis of up-/down-/all differential genes
if(!file.exists(paste0(gse_number,"_KEGG.Rdata"))){
kk.up <- enrichKEGG(gene = gene_up,
organism = 'hsa')
kk.down <- enrichKEGG(gene = gene_down,
organism = 'hsa')
kk.diff <- enrichKEGG(gene = gene_diff,
organism = 'hsa')
save(kk.diff,kk.down,kk.up,file = paste0(gse_number,"_KEGG.Rdata"))
}
load(paste0(gse_number,"_KEGG.Rdata"))
#(3)https://mp.weixin.qq.com/s/NglawJgVgrMJ0QfD-YRBQg
table(kk.diff@result$p.adjust<0.05)
table(kk.up@result$p.adjust<0.05)
table(kk.down@result$p.adjust<0.05)
#(4)Two-way bar chart
down_kegg <- kk.down@result %>%
filter(pvalue<0.05) %>%
mutate(group=-1)
up_kegg <- kk.up@result %>%
filter(pvalue<0.05) %>%
mutate(group=1)
source("kegg_plot_function.R")
g_kegg <- kegg_plot(up_kegg,down_kegg)
g_kegg
#kegg_plot_function.R
library(ggthemes)
library(ggplot2)
kegg_plot <- function(up.data,down.data){
dat=rbind(up.data,down.data)
colnames(dat)
dat$pvalue = -log10(dat$pvalue)
dat$pvalue=dat$pvalue*dat$group
dat=dat[order(dat$pvalue,decreasing = F),]
gk_plot <- ggplot(dat,aes(reorder(Description, pvalue), y=pvalue)) +
geom_bar(aes(fill=factor((pvalue>0)+1)),stat="identity", width=0.7, position=position_dodge(0.7)) +
coord_flip() +
scale_fill_manual(values=c("#0072B2", "#B20072"), guide="none") +
labs(x="", y="" ) +
theme_pander() +
theme(panel.grid.major = element_blank(),
panel.grid.minor = element_blank(),
#axis.ticks.x = element_blank(),
axis.line.x = element_line(size = 0.3, colour = "black"),
axis.ticks.length.x = unit(-0.20, "cm"),
axis.text.x = element_text(margin = margin(t = 0.3, unit = "cm")),
axis.ticks.x = element_line(colour = "black",size = 0.3) ,
axis.ticks.y = element_blank(),
axis.text.y = element_text(hjust=0),
panel.background = element_rect(fill=NULL, colour = 'white')
)
}
#GSEA
library(stringr)
library(clusterProfiler)
library(org.Hs.eg.db)
library(ggplot2)
library(enrichplot)
load("step4output.Rdata")
head(deg,3)
geneList = deg$logFC
names(geneList) = deg$ENTREZID
geneList = sort(geneList,decreasing = T)
head(geneList)
ego <- gseGO(geneList = geneList,
OrgDb = org.Hs.eg.db,
ont = "BP")
head(ego@result,3)
ekk <- gseKEGG(geneList = geneList,
verbose = T)
head(ekk@result,3)
gseaplot2(ego, geneSetID = 1:3)
gseaplot2(ekk, geneSetID = 1:5)
gseaplot2(ekk, geneSetID = 6:11)
gseaplot2(ekk, geneSetID = 12:13)

## Sheet: Somatic mutations
merge_maf <- function(metadata, path){
filenames <- file.path(path, metadata$file_id, metadata$file_name,
fsep = .Platform$file.sep)
message ('############### Merging maf data ################\n',
'### This step may take a few minutes ###\n')
mafMatrix <- do.call("rbind", lapply(filenames, function(fl)
read.table(gzfile(fl),header=T,sep="\t",quote="",fill=T,colClasses="character")))
return (mafMatrix)
}
FilterDuplicate <- function(metadata) {
filter <- which(duplicated(metadata[,'sample']))
if (length(filter) != 0) {
metadata <- metadata[-filter,]
}
message (paste('Removed', length(filter), 'samples', sep=' '))
return (metadata)
}
metaMatrix.maf=read.table("maf_sample_sheet.tsv",sep="\t",header=T)
names(metaMatrix.maf)=gsub("sample_id","sample",gsub("\\.","_",tolower(names(metaMatrix.maf))))
metaMatrix.maf$sample_type=gsub(" ","",metaMatrix.maf$sample_type)
metaMatrix.maf <- FilterDuplicate(metaMatrix.maf)
maf_value=merge_maf(metadata=metaMatrix.maf,
path="maf_data"
)
write.table(file="combined_maf_value.txt",maf_value,row.names=F,quote=F,sep="\t")
rm(list = ls())
library(maftools)
#maf = read.maf(maf = 'combined_maf_value.txt')
maf = read.maf(maf = 'low.txt')
pdf(file="waterfall.pdf",width=7,height=6)
oncoplot(maf = maf,top = 20, fontSize = 0.8 ,showTumorSampleBarcodes = F )
dev.off()
pdf(file="waterfall-gene.pdf",width=7,height=6)
gene=c("TP53","PIK3CA")
oncoplot(maf = maf, genes=gene,fontSize = 0.8 ,showTumorSampleBarcodes = F)
dev.off()
pdf(file="waterfall-ge.pdf",width=7,height=6)
oncoplot(maf = maf,top = 20,gene_mar=7,draw_titv=T)
dev.off()

## Sheet: Immune analysis
#cibersort.R
CoreAlg <- function(X, y){
#try different values of nu
svn_itor <- 3
res <- function(i){
if(i==1){nus <- 0.25}
if(i==2){nus <- 0.5}
if(i==3){nus <- 0.75}
model<-e1071::svm(X,y,type="nu-regression",kernel="linear",nu=nus,scale=F)
model
}
if(Sys.info()['sysname'] == 'Windows') out <- parallel::mclapply(1:svn_itor, res, mc.cores=1) else
out <- parallel::mclapply(1:svn_itor, res, mc.cores=svn_itor)
nusvm <- rep(0,svn_itor)
corrv <- rep(0,svn_itor)
#do cibersort
t <- 1
while(t <= svn_itor) {
weights = t(out[[t]]$coefs) %*% out[[t]]$SV
weights[which(weights<0)]<-0
w<-weights/sum(weights)
u <- sweep(X,MARGIN=2,w,'*')
k <- apply(u, 1, sum)
nusvm[t] <- sqrt((mean((k - y)^2)))
corrv[t] <- cor(k, y)
t <- t + 1
}
#pick best model
rmses <- nusvm
mn <- which.min(rmses)
model <- out[[mn]]
#get and normalize coefficients
q <- t(model$coefs) %*% model$SV
q[which(q<0)]<-0
w <- (q/sum(q))
mix_rmse <- rmses[mn]
mix_r <- corrv[mn]
newList <- list("w" = w, "mix_rmse" = mix_rmse, "mix_r" = mix_r)
}
#' do permutations
#' @param perm Number of permutations
#' @param X cell-specific gene expression
#' @param y mixed expression per sample
#' @export
doPerm <- function(perm, X, Y){
itor <- 1
Ylist <- as.list(data.matrix(Y))
dist <- matrix()
while(itor <= perm){
#print(itor)
#random mixture
yr <- as.numeric(Ylist[sample(length(Ylist),dim(X)[1])])
#standardize mixture
yr <- (yr - mean(yr)) / sd(yr)
#run CIBERSORT core algorithm
result <- CoreAlg(X, yr)
mix_r <- result$mix_r
#store correlation
if(itor == 1) {dist <- mix_r}
else {dist <- rbind(dist, mix_r)}
itor <- itor + 1
}
newList <- list("dist" = dist)
}
#' Main functions
#' @param sig_matrix file path to gene expression from isolated cells
#' @param mixture_file heterogenous mixed expression
#' @param perm Number of permutations
#' @param QN Perform quantile normalization or not (TRUE/FALSE)
#' @export
CIBERSORT <- function(sig_matrix, mixture_file, perm=0, QN=TRUE){
#read in data
X <- read.table(sig_matrix,header=T,sep="\t",row.names=1,check.names=F)
Y <- read.table(mixture_file, header=T, sep="\t", row.names=1,check.names=F)
X <- data.matrix(X)
Y <- data.matrix(Y)
#order
X <- X[order(rownames(X)),]
Y <- Y[order(rownames(Y)),]
P <- perm #number of permutations
#anti-log if max < 50 in mixture file
if(max(Y) < 50) {Y <- 2^Y}
#quantile normalization of mixture file
if(QN == TRUE){
tmpc <- colnames(Y)
tmpr <- rownames(Y)
Y <- preprocessCore::normalize.quantiles(Y)
colnames(Y) <- tmpc
rownames(Y) <- tmpr
}
#intersect genes
Xgns <- row.names(X)
Ygns <- row.names(Y)
YintX <- Ygns %in% Xgns
Y <- Y[YintX,]
XintY <- Xgns %in% row.names(Y)
X <- X[XintY,]
#standardize sig matrix
X <- (X - mean(X)) / sd(as.vector(X))
#empirical null distribution of correlation coefficients
if(P > 0) {nulldist <- sort(doPerm(P, X, Y)$dist)}
#print(nulldist)
header <- c('Mixture',colnames(X),"P-value","Correlation","RMSE")
#print(header)
output <- matrix()
itor <- 1
mixtures <- dim(Y)[2]
pval <- 9999
#iterate through mixtures
while(itor <= mixtures){
y <- Y[,itor]
#standardize mixture
y <- (y - mean(y)) / sd(y)
#run SVR core algorithm
result <- CoreAlg(X, y)
#get results
w <- result$w
mix_r <- result$mix_r
mix_rmse <- result$mix_rmse
#calculate p-value
if(P > 0) {pval <- 1 - (which.min(abs(nulldist - mix_r)) / length(nulldist))}
#print output
out <- c(colnames(Y)[itor],w,pval,mix_r,mix_rmse)
if(itor == 1) {output <- out}
else {output <- rbind(output, out)}
itor <- itor + 1
}
#save results
write.table(rbind(header,output), file="CIBERSORT-Results.txt", sep="\t", row.names=F, col.names=F, quote=F)
#return matrix object containing all results
obj <- rbind(header,output)
obj <- obj[,-1]
obj <- obj[-1,]
obj <- matrix(as.numeric(unlist(obj)),nrow=nrow(obj))
rownames(obj) <- colnames(Y)
colnames(obj) <- c(colnames(X),"P-value","Correlation","RMSE")
obj
}
source('Cibersort.R')
CIBERSORT('LM22.txt','exp.txt', perm = 1000, QN = T)
results<-read.table("CIBERSORT-Results.txt",header=TRUE,row.names = 1,check.names = FALSE,sep="\t")
results[1:5,]
group=read.csv(file="group.csv", header = T, sep = ",")
#write.csv(results,file = "results.csv")
rm(list = ls())
results<-read.table("highrisk.txt",header=TRUE,row.names = 1,check.names = FALSE,sep="\t")
results[1:5,]
group=read.csv(file="group.csv", header = T, sep = ",")
library(pheatmap)
re <- results[,-(23:25)]
k <- apply(re,2,function(x) {sum(x == 0) < nrow(results)/2})
re2 <- as.data.frame(t(re[,k]))
an = data.frame(Group = group$Group,
row.names = group$Sample)
bk <- c(seq(-15,-5,by=1),seq(-4.9,4.9,by=0.2),seq(5,15,by=1))
pheatmap(re2,scale = "row",
show_colnames = F,
cluster_cols = F,
annotation_col = an,
drop_levels = TRUE,
color = c(rep("#369f2d",11),colorRampPalette(colors = c("#369f2d","white","#fa8e44"))(50),
rep("#fa8e44",11)),
breaks = bk,
#legend_breaks = c(-5,-2,0,2,5)
)
library(RColorBrewer)
library(tidyr)
library(tibble)
library(ggplot2)
mypalette <- colorRampPalette(brewer.pal(8,"Set1"))
dat <- re %>% as.data.frame() %>%
rownames_to_column("Sample") %>%
gather(key = Cell_type,value = Proportion,-Sample)
ggplot(dat,aes(Sample,Proportion,fill = Cell_type)) +
geom_bar(stat = "identity") +
labs(fill = "Cell Type",x = "",y = "Estiamted Proportion") +
theme_bw() +
theme(axis.text.x = element_blank(),
axis.ticks.x = element_blank(),
legend.position = "bottom") +
scale_y_continuous(expand = c(0.01,0)) +
scale_fill_manual(values = mypalette(22))
ggplot(dat,aes(Cell_type,Proportion,fill = Cell_type)) +
geom_boxplot(outlier.shape = 21,color = "black") +
theme_bw() +
labs(x = "Cell Type", y = "Estimated Proportion") +
theme(axis.text.x = element_blank(),
axis.ticks.x = element_blank(),
legend.position = "bottom") +
scale_fill_manual(values = mypalette(22))
library(dplyr)
a = dat %>%
group_by(Cell_type) %>%
summarise(m = median(Proportion)) %>%
arrange(desc(m)) %>%
pull(Cell_type)
dat$Cell_type = factor(dat$Cell_type,levels = a)
ggplot(dat,aes(Cell_type,Proportion,fill = Cell_type)) +
geom_boxplot(outlier.shape = 21,color = "black") +
theme_bw() +
labs(x = "Cell Type", y = "Estimated Proportion") +
theme(axis.text.x = element_blank(),
axis.ticks.x = element_blank(),
legend.position = "bottom") +
scale_fill_manual(values = mypalette(22))
library(stringr)
library(ggpubr)
dat = merge(dat,group,by="Sample")
ggplot(dat,aes(Cell_type,Proportion,fill = Group)) +
geom_boxplot(outlier.shape = 21,color = "black") +
theme_bw() +
labs(x = "Cell Type", y = "Estimated Proportion") +
theme(legend.position = "top") +
theme(axis.text.x = element_text(angle=80,vjust = 0.5))+
scale_fill_manual(values = mypalette(22)[c(6,1)])+
scale_fill_manual(values=c("#fa8e44",
"#369f2d"))+
stat_compare_means(aes(group = Group,label = ..p.signif..),method = "kruskal.test")

## Sheet: Drug sensitivity analysis
library(limma)
library(oncoPredict)
library(parallel)
library(ggplot2)
library(ggpubr)
set.seed(12345)
pFilter=0.05
gene="CHDH"
expFile="exprSet.txt"
#Data preparation
rt = read.table(expFile, header=T, sep="\t", check.names=F)
rt=as.matrix(rt)
rownames(rt)=rt[,1]
exp=rt[,2:ncol(rt)]
dimnames=list(rownames(exp), colnames(exp))
data=matrix(as.numeric(as.matrix(exp)), nrow=nrow(exp), dimnames=dimnames)
data=avereps(data)
data=data[rowMeans(data)>0.5,]
group=sapply(strsplit(colnames(data),"\\-"), "[", 4)
group=sapply(strsplit(group,""), "[", 1)
group=gsub("2","1",group)
data=data[,group==0]
data=t(data)
rownames(data)=gsub("(.*?)\\-(.*?)\\-(.*?)\\-(.*?)\\-(.*)", "\\1\\-\\2\\-\\3", rownames(data))
data=avereps(data)
data=t(data)
#Read the drug sensitivity file for analysis
GDSC2_Expr=readRDS(file='GDSC2_Expr.rds')
GDSC2_Res=readRDS(file = 'GDSC2_Res.rds')
GDSC2_Res=exp(GDSC2_Res)
calcPhenotype(trainingExprData = GDSC2_Expr,
trainingPtype = GDSC2_Res,
testExprData = data,
batchCorrect = 'eb', #"eb" for ComBat
powerTransformPhenotype = TRUE,
removeLowVaryingGenes = 0.2,
minNumSamples = 10,
printOutput = TRUE,
removeLowVaringGenesFrom = 'rawData')
senstivity <- read.csv("calcPhenotype_Output\\DrugPredictions.csv", header=T, sep=",", check.names=F, row.names=1)
colnames(senstivity)=gsub("(.*)\\_(\\d+)", "\\1", colnames(senstivity))
gene="DNMT3B"
geneExp=as.matrix(t(data[gene,,drop=F]))
Type=ifelse(geneExp[,gene]>median(geneExp[,gene]), "High", "Low")
Type=factor(Type, levels=c("Low", "High"))
exp=cbind(as.data.frame(geneExp), Type)
sameSample=intersect(row.names(exp), row.names(senstivity))
Type=exp[sameSample, "Type",drop=F]
senstivity=senstivity[sameSample,,drop=F]
rt=cbind(Type, senstivity)
rt$Type=factor(rt$Type, levels=c("Low", "High"))
type=levels(factor(rt[,"Type"]))
comp=combn(type, 2)
my_comparisons=list()
for(i in 1:ncol(comp)){my_comparisons[[i]]<-comp[,i]}
for(drug in colnames(rt)[2:ncol(rt)]){
rt1=rt[,c(drug, "Type")]
colnames(rt1)=c("Drug", "Type")
rt1=na.omit(rt1)
rt1$Drug=log2(rt1$Drug+1)
test=wilcox.test(Drug ~ Type, data=rt1)
diffPvalue=test$p.value
if(diffPvalue<pFilter){
boxplot=ggboxplot(rt1, x="Type", y="Drug", fill="Type",
xlab=gene,
ylab=paste0(drug, " senstivity"),
legend.title=gene,
palette=c("#369F2D", "#FA8E44")
)+
stat_compare_means(comparisons=my_comparisons)
pdf(file=paste0("drugSenstivity.", drug, ".pdf"), width=5, height=4.5)
print(boxplot)
dev.off()
}
}
library(limma)
library(ggplot2)
library(ggpubr)
library(ggExtra)
gene="CHKB"
corFilter=0.3
pFilter=0.05
expFile="exprSet.txt"
drugFile="DrugPredictions.csv"
rt0=read.csv(drugFile,header=T,check.names=F,row.names = 1)
rt0=as.matrix(t(rt0))
rt=read.table(expFile, header=T, sep="\t", check.names=F)
rt=as.matrix(rt)
rownames(rt)=rt[,1]
exp=rt[,2:ncol(rt)]
dimnames=list(rownames(exp), colnames(exp))
data=matrix(as.numeric(as.matrix(exp)), nrow=nrow(exp), dimnames=dimnames)
data=avereps(data)
data=data[rowMeans(data)>1,]
group=sapply(strsplit(colnames(data),"\\-"), "[", 4)
group=sapply(strsplit(group,""), "[", 1)
group=gsub("2", "1", group)
data=data[,group==0]
data=log2(data+1)
x=as.numeric(data[gene,])
outTab=data.frame()
for(j in rownames(rt0)){
	if(gene==j){next}
y=as.numeric(rt0[j,])
	corT=cor.test(x, y, method = 'pearson')
	cor=corT$estimate
	pvalue=corT$p.value
	outTab=rbind(outTab, cbind(Query=gene, Gene=j, cor, pvalue))
	if((abs(cor)>corFilter) & (pvalue<pFilter)){
		df1=as.data.frame(cbind(x,y))
		p1=ggplot(df1, aes(x, y)) +
			xlab(paste0(gene, " expression"))+ ylab(past		geom_point()+ geom_smooth(method="lm", formula=y~x) + theme_bw()+
			stat_cor(method = 'pearson', aes(x =x, y =y))
		pdf(file=paste0(j, ".pdf"), width=5, height=4.6)
		print(p1)
		dev.off()
	}
}
